# Supplementary material
Source: ML conference proceedings conference paper supplement (https://openaccess.thecvf.com/content/ICCV_2019/html/Yue_Domain_Randomization_and_ICCV_2019_paper.html)
Supplement: Supplementary file 1 [file Yue_Domain_Randomization_and_ICCV_2019_supplemental.pdf]

# Appendix

## A. Detailed Comparison with Other Works.

In Section 4.4 and Section 4.5 of our main paper, we provide comparison of the overall performance (mean IoU) of the models, specifically comparison with other domain generalization works from GTA to Cityscapes, and with other domain adaptation works from GTA to Cityscapes as well as from SYNTHIA to Cityscapes. Here, we provide more detailed comparison of the class-wise accuracies in Table 7, Table 8, and Table 9. From the detailed tables, we can see that our method provides better performance in many classes and outperforms the state-of-the-art methods in terms of *mIoU* under both domain generalization and domain adaptation, which shows the efficacy and superiority of our method.

## B. Additional Experiments on auxiliary domains and color augmentation.

Two more experiments are conducted with FCN8s-VGG16 in this section. First, we re-run our approach with 15 real-world styles from the BDD dataset, including different weather conditions, time of day (TOD), *etc.* Then, we replace the style transfer step with 15 color augmentations<sup>1</sup>, varying the hue, saturation, grayscale, contrast, *etc.* These changes preserve the semantics of the objects.

Table 6 shows the new results (last two rows) along with those reported in the main paper. “Random” stands for the styles randomly selected from ImageNet and Artworks, and “Semantics” are the styles of the Cityscapes classes (*e.g.*, Car, Road, *etc.*). The results are close to each other except that the color augmentation is a little worse than the others. The pyramid consistency is effective for all the test cases.

Table 6. Adaptation from GTA with different style sets. We report results (mIoU%) both without / with the pyramid consistency.

| Style Set    | Semantics Safe? | Cityscapes    | Mapillary     |
|--------------|-----------------|---------------|---------------|
| Random       | ✗               | 34.64 / 36.11 | 31.64 / 32.25 |
| Semantics    | ✗               | 34.84 / 35.62 | 31.29 / 32.18 |
| Weather-TOD  | ✗               | 34.51 / 35.89 | 31.24 / 32.18 |
| Color Change | ✓               | 33.56 / 34.52 | 30.27 / 32.06 |

## C. More Discussion.

Table 6 shows that the color augmentation performs a little worse than the style transfers probably for two reasons. One is that it does not bring to the synthetic images any appearances of the real images by design. The other is that it randomizes the images only by color (almost uniformly) and no texture. Learning an optimal non-uniform color shift policy is another future direction to explore.

<sup>1</sup><https://github.com/aleju/imgaug>

Table 6 shows that different style sets, including the real styles (*i.e.* weather) suggested by R3, lead to similar results. Together with Figure 4 in the paper, we find that “how many domains” influences the results more than “what domains”.

Table 7. Class-wise Performance comparison on Domain Generalization from GTA to Cityscapes with ResNet-50 base network.

| Network   | Method        | Train w/ Tgt | Val on Tgt | road | sidewalk | building | wall | fence | pole | traffic light | traffic sign | vegetation | terrain | sky  | person | rider | car  | truck | bus  | train | motorbike | bicycle | mIoU         |
|-----------|---------------|--------------|------------|------|----------|----------|------|-------|------|---------------|--------------|------------|---------|------|--------|-------|------|-------|------|-------|-----------|---------|--------------|
|           |               |              |            | -    | -        | -        | -    | -     | -    | -             | -            | -          | -       | -    | -      | -     | -    | -     | -    | -     | -         | -       | -            |
| ResNet-50 | NonAdapt [34] | ✗            | ✗          | -    | -        | -        | -    | -     | -    | -             | -            | -          | -       | -    | -      | -     | -    | -     | -    | -     | -         | -       | 22.17        |
|           | IBN-Net [34]  | ✗            | ✗          | -    | -        | -        | -    | -     | -    | -             | -            | -          | -       | -    | -      | -     | -    | -     | -    | -     | -         | -       | 29.64        |
|           | NonAdapt Ours | ✗            | ✗          | 84.5 | 12.3     | 75.4     | 19.2 | 9.1   | 18.7 | 19.2          | 7.5          | 81.6       | 30.9    | 73.8 | 42.7   | 8.9   | 76.4 | 17.2  | 27.8 | 1.8   | 8.6       | 1.2     | 32.45        |
|           |               |              |            | 90.1 | 21.6     | 79.4     | 25.6 | 18.2  | 22.6 | 26.4          | 16.5         | 82.9       | 34.3    | 77.1 | 46.1   | 13.5  | 78.3 | 24.4  | 29.1 | 3.6   | 13.4      | 7.8     | <b>37.42</b> |

Table 8. Class-wise Performance comparison from GTA to Cityscapes with VGG base network. All the best accuracies with respect to VGG-16 base network are in bold.

| Network       | Method          | Train w/ Tgt | Val on Tgt | road        | sidewalk    | building | wall        | fence       | pole | traffic light | traffic sign | vegetation  | terrain     | sky  | person      | rider       | car         | truck | bus         | train      | motorbike   | bicycle      | mIoU |      |
|---------------|-----------------|--------------|------------|-------------|-------------|----------|-------------|-------------|------|---------------|--------------|-------------|-------------|------|-------------|-------------|-------------|-------|-------------|------------|-------------|--------------|------|------|
|               |                 |              |            | -           | -           | -        | -           | -           | -    | -             | -            | -           | -           | -    | -           | -           | -           | -     | -           | -          | -           | -            | -    | -    |
| VGG19         | NonAdapt [56]   | ✓            | ✓          | 18.1        | 6.8         | 64.1     | 7.3         | 8.7         | 21.0 | 14.9          | 16.8         | 45.9        | 2.4         | 64.4 | 41.6        | 17.5        | 55.3        | 8.4   | 5.0         | 6.9        | 4.3         | 13.8         | 22.3 |      |
|               | Curriculum [56] | ✓            | ✓          | 74.9        | 22.0        | 71.7     | 6.0         | 11.9        | 8.4  | 16.3          | 11.1         | 75.7        | 13.3        | 66.5 | 38.0        | 9.3         | 55.2        | 18.8  | 18.9        | 0.0        | 16.8        | 16.6         | 28.9 |      |
|               | CGAN [20]       | ✓            | ✓          | 89.2        | 49.0        | 70.7     | 13.5        | 10.9        | 38.5 | 29.4          | 33.7         | 77.9        | 37.6        | 65.8 | 75.1        | 32.4        | 77.8        | 39.2  | 45.2        | 0.0        | 25.5        | 35.4         | 44.5 |      |
| VGG16         | NonAdapt [19]   | ✓            | ✓          | 31.9        | 18.9        | 47.7     | 7.4         | 3.1         | 16.0 | 10.4          | 1.0          | 76.5        | 13.0        | 58.9 | 36.0        | 1.0         | 67.1        | 9.5   | 3.7         | 0.0        | 0.0         | 0.0          | 21.1 |      |
|               | FCNs Wld [19]   | ✓            | ✓          | 70.4        | 32.4        | 62.1     | 14.9        | 5.4         | 10.9 | 14.2          | 2.7          | 79.2        | 21.3        | 64.6 | 44.1        | 4.2         | 70.4        | 8.0   | 7.3         | 0.0        | 3.5         | 0.0          | 27.1 |      |
|               | NonAdapt [41]   | ✓            | ✓          | 73.5        | 21.3        | 72.3     | 18.9        | 14.3        | 12.5 | 15.1          | 5.3          | 77.2        | 17.4        | 64.3 | 43.7        | 12.8        | 75.4        | 24.8  | 7.8         | 0.0        | 4.9         | 1.8          | 29.6 |      |
|               | LSD [41]        | ✓            | ✓          | 88.0        | 30.5        | 78.6     | 25.2        | <b>23.5</b> | 16.7 | 23.5          | 11.6         | 78.7        | 27.2        | 71.9 | 51.3        | <b>19.5</b> | 80.4        | 19.8  | 18.3        | 0.9        | <b>20.8</b> | 18.4         | 37.1 |      |
|               | NonAdapt [3]    | ✓            | ✓          | 29.8        | 16.0        | 56.6     | 9.2         | 17.3        | 13.5 | 13.6          | 9.8          | 74.9        | 6.7         | 54.3 | 41.9        | 2.9         | 45.0        | 3.3   | 13.1        | 1.3        | 6.8         | 0.0          | 21.9 |      |
|               | ROAD [3]        | ✓            | ✓          | 85.4        | 31.2        | 78.6     | <b>27.9</b> | 22.2        | 21.9 | 23.7          | 11.4         | 80.7        | 29.3        | 68.9 | 48.5        | 14.1        | 78.0        | 19.1  | 23.8        | <b>9.4</b> | 8.3         | 0.0          | 35.9 |      |
|               | NonAdapt [18]   | ✓            | ✓          | 26.0        | 14.9        | 65.1     | 5.5         | 12.9        | 8.9  | 6.0           | 2.5          | 70.0        | 2.9         | 47.0 | 24.5        | 0.0         | 40.0        | 12.1  | 1.5         | 0.0        | 0.0         | 0.0          | 17.9 |      |
|               | CyCADA [18]     | ✓            | ✓          | 85.2        | 37.2        | 76.5     | 21.8        | 15.0        | 23.8 | 22.9          | <b>21.5</b>  | 80.5        | 31.3        | 60.7 | 50.5        | 9.0         | 76.9        | 17.1  | <b>28.2</b> | 4.5        | 9.8         | 0.0          | 35.4 |      |
|               | NonAdapt [40]   | ✓            | ✓          | 25.9        | 10.9        | 50.5     | 3.3         | 12.2        | 25.4 | 28.6          | 13           | 78.3        | 7.3         | 63.9 | 52.1        | 7.9         | 66.3        | 5.2   | 7.8         | 0.9        | 13.7        | 0.7          | 24.9 |      |
|               | MCD [40]        | ✓            | ✓          | 86.4        | 8.5         | 76.1     | 18.6        | 9.7         | 14.9 | 7.8           | 0.6          | <b>82.8</b> | 32.7        | 71.4 | 25.2        | 1.1         | 76.3        | 16.1  | 17.1        | 1.4        | 0.2         | 0.0          | 28.8 |      |
|               | I2I [32]        | ✓            | ✓          | 85.3        | 38.0        | 71.3     | 18.6        | 16          | 18.7 | 12            | 4.5          | 72          | <b>43.4</b> | 63.7 | 43.1        | 3.3         | 76.7        | 14.4  | 12.8        | 0.3        | 9.8         | 0.6          | 31.8 |      |
|               | NonAdapt [62]   | ✓            | ✓          | 64.0        | 22.1        | 68.6     | 13.3        | 8.7         | 19.9 | 15.5          | 5.9          | 74.9        | 13.4        | 37.0 | 37.7        | 10.3        | 48.2        | 6.1   | 1.2         | 1.8        | 10.8        | 2.9          | 24.3 |      |
|               | CBST-SP [62]    | ✓            | ✓          | <b>90.4</b> | <b>50.8</b> | 72.0     | 18.3        | 9.5         | 27.2 | 28.6          | 14.1         | 82.4        | 25.1        | 70.8 | 42.6        | 14.5        | 76.9        | 5.9   | 12.5        | 1.2        | 14.0        | <b>28.6</b>  | 36.1 |      |
|               | NonAdapt [52]   | ✓            | ✓          | 72.5        | 25.1        | 71.2     | 6.6         | 13.4        | 12.3 | 11.0          | 4.7          | 76.1        | 16.4        | 67.7 | 43.1        | 8.0         | 70.4        | 11.3  | 4.8         | 0.0        | 13.9        | 0.4          | 27.8 |      |
|               | DCAN [52]       | ✓            | ✓          | 82.3        | 26.7        | 77.4     | 23.7        | 20.5        | 20.4 | <b>30.3</b>   | 15.9         | 80.9        | 25.4        | 69.5 | <b>52.6</b> | 11.1        | 79.6        | 24.9  | 21.2        | 1.3        | 17.0        | 6.7          | 36.2 |      |
|               | NonAdapt [60]   | ✓            | ✓          | -           | -           | -        | -           | -           | -    | -             | -            | -           | -           | -    | -           | -           | -           | -     | -           | -          | -           | -            | -    | 30.0 |
|               | PTP [60]        | ✓            | ✓          | -           | -           | -        | -           | -           | -    | -             | -            | -           | -           | -    | -           | -           | -           | -     | -           | -          | -           | -            | -    | 38.1 |
|               | AdaptSeg [50]   | ✓            | ✓          | 87.3        | 29.8        | 78.6     | 21.1        | 18.2        | 22.5 | 21.5          | 11.0         | 79.7        | 29.6        | 71.3 | 46.8        | 6.5         | 80.1        | 23.0  | 26.9        | 0.0        | 10.6        | 0.3          | 35.0 |      |
|               | NonAdapt [21]   | ✓            | ✓          | -           | -           | -        | -           | -           | -    | -             | -            | -           | -           | -    | -           | -           | -           | -     | -           | -          | -           | -            | -    | 18.8 |
|               | DAM [21]        | ✓            | ✓          | -           | -           | -        | -           | -           | -    | -             | -            | -           | -           | -    | -           | -           | -           | -     | -           | -          | -           | -            | -    | 32.6 |
| NonAdapt Ours | ✗               | ✓            | 68.4       | 24.7        | 68.9        | 18.1     | 15.2        | 18.1        | 16.7 | 9.6           | 78.4         | 18.3        | 65.7        | 43.6 | 12.3        | 69.1        | 18.7        | 16.1  | 0.4         | 5.3        | 3.2         | 30.04        |      |      |
| Ours          | ✗               | ✓            | 86.6       | 38.4        | <b>79.8</b> | 26.4     | 18.1        | <b>34.7</b> | 21.3 | 16.3          | 81.2         | 28.7        | <b>76.5</b> | 50.1 | 16.6        | <b>80.7</b> | <b>28.3</b> | 21.4  | 2.3         | 14.3       | 10.9        | <b>38.56</b> |      |      |
| NonAdapt Ours | ✗               | ✗            | 66.4       | 23.9        | 69.1        | 16.3     | 15.8        | 19.6        | 15.8 | 8.6           | 77.7         | 19.5        | 66.1        | 43.2 | 12.1        | 68.9        | 17.3        | 17.2  | 0.3         | 4.8        | 2.9         | 29.76        |      |      |
| Ours          | ✗               | ✗            | 84.6       | 31.5        | 76.3        | 25.4     | 17.2        | 28.2        | 21.5 | 13.7          | 80.7         | 26.8        | 74.9        | 47.5 | 15.8        | 77.1        | 22.2        | 22.7  | 1.7         | 8.9        | 9.7         | 36.11        |      |      |

Table 9. Class-wise Performance comparison from SYNTHIA to Cityscapes with VGG base network. All the best accuracies with respect to VGG-16 base network are in bold.

| Network | Method          | Train w/ Tgt | Val on Tgt | road        | sidewalk    | building    | wall        | fence      | pole        | traffic light | traffic sign | vegetation  | sky         | person      | rider       | car         | bus         | motorbike   | bicycle     | mIoU        |   |      |      |
|---------|-----------------|--------------|------------|-------------|-------------|-------------|-------------|------------|-------------|---------------|--------------|-------------|-------------|-------------|-------------|-------------|-------------|-------------|-------------|-------------|---|------|------|
|         |                 |              |            | -           | -           | -           | -           | -          | -           | -             | -            | -           | -           | -           | -           | -           | -           | -           | -           | -           | - | -    | -    |
| VGG19   | NonAdapt [56]   | ✓            | ✓          | 5.6         | 11.2        | 59.6        | 0.8         | 0.5        | 21.5        | 8.0           | 5.3          | 72.4        | 75.6        | 35.1        | 9.0         | 23.6        | 4.5         | 0.5         | 18.0        | 22.0        |   |      |      |
|         | Curriculum [56] | ✓            | ✓          | 65.2        | 26.1        | 74.9        | 0.1         | 0.5        | 10.7        | 3.7           | 3.0          | 76.1        | 70.6        | 47.1        | 8.2         | 43.2        | 20.7        | 0.7         | 13.1        | 29.0        |   |      |      |
|         | CGAN [20]       | ✓            | ✓          | 85.0        | 25.8        | 73.5        | 3.4         | 3.0        | 31.5        | 19.5          | 21.3         | 67.4        | 69.4        | 68.5        | 25.0        | 76.5        | 41.6        | 17.9        | 29.5        | 41.2        |   |      |      |
| VGG16   | NonAdapt [19]   | ✓            | ✓          | 6.4         | 17.7        | 29.7        | 1.2         | 0.0        | 15.1        | 0.0           | 7.2          | 30.3        | 66.8        | 51.1        | 1.5         | 47.3        | 3.9         | 0.1         | 0.0         | 17.4        |   |      |      |
|         | FCNs Wld [19]   | ✓            | ✓          | 11.5        | 19.6        | 30.8        | 4.4         | 0.0        | 20.3        | 0.1           | 11.7         | 42.3        | 68.7        | <b>51.2</b> | 3.8         | 54.0        | 3.2         | 0.2         | 0.6         | 20.2        |   |      |      |
|         | NonAdapt [41]   | ✓            | ✓          | 30.1        | 17.5        | 70.2        | 5.9         | 0.1        | 16.7        | 9.1           | 12.6         | 74.5        | 76.3        | 43.9        | 13.2        | 35.7        | 14.3        | 3.7         | 5.6         | 26.8        |   |      |      |
|         | LSD [41]        | ✓            | ✓          | <b>80.1</b> | 29.1        | 77.5        | 2.8         | 0.4        | 26.8        | 11.1          | 18.0         | 78.1        | 76.7        | 48.2        | 15.2        | <b>70.5</b> | <b>17.4</b> | 8.7         | 16.7        | 36.1        |   |      |      |
|         | NonAdapt [3]    | ✓            | ✓          | 4.7         | 11.6        | 62.3        | 10.7        | 0.0        | 22.8        | 4.3           | 15.3         | 68.0        | 70.8        | 49.7        | 6.4         | 60.5        | 11.8        | 2.6         | 4.3         | 25.4        |   |      |      |
|         | ROAD [3]        | ✓            | ✓          | 77.7        | 30.0        | 77.5        | 9.6         | 0.3        | 25.8        | 10.3          | 15.6         | 77.6        | 79.8        | 44.5        | 16.6        | 67.8        | 14.5        | 7.0         | 23.8        | 36.2        |   |      |      |
|         | NonAdapt [62]   | ✓            | ✓          | 17.2        | 19.7        | 47.3        | 1.1         | 0.0        | 19.1        | 3.0           | 9.1          | 71.8        | 78.3        | 37.6        | 4.7         | 42.2        | 9.0         | 0.1         | 0.9         | 22.6        |   |      |      |
|         | CBST [62]       | ✓            | ✓          | 69.6        | 28.7        | 69.5        | <b>12.1</b> | 0.1        | 25.4        | <b>11.9</b>   | 13.6         | <b>82.0</b> | <b>81.9</b> | 49.1        | 14.5        | 66.0        | 6.6         | 3.7         | 32.4        | 35.4        |   |      |      |
|         | NonAdapt [52]   | ✓            | ✓          | 10.8        | 11.4        | 66.6        | 1.6         | 0.1        | 16.9        | 5.5           | 14.1         | 74.2        | 76.2        | 46.0        | 11.5        | 45.4        | 15.1        | 6.0         | 13.4        | 25.9        |   |      |      |
|         | DCAN [52]       | ✓            | ✓          | 79.9        | 30.4        | 70.8        | 1.6         | <b>0.6</b> | 22.3        | 6.7           | <b>23.0</b>  | 76.9        | 73.9        | 41.9        | <b>16.7</b> | 61.7        | 11.5        | <b>10.3</b> | <b>38.6</b> | 35.4        |   |      |      |
|         | DAM [21]        | ✓            | ✓          | -           | -           | -           | -           | -          | -           | -             | -            | -           | -           | -           | -           | -           | -           | -           | -           | -           | - | 30.7 |      |
|         | NonAdapt [60]   | ✓            | ✓          | -           | -           | -           | -           | -          | -           | -             | -            | -           | -           | -           | -           | -           | -           | -           | -           | -           | - | -    | 24.9 |
|         | PTP [60]        | ✓            | ✓          | -           | -           | -           | -           | -          | -           | -             | -            | -           | -           | -           | -           | -           | -           | -           | -           | -           | - | -    | 34.2 |
|         | NonAdapt Ours   | ✗            | ✓          | 15.6        | 12.3        | 70.3        | 6.7         | 0.2        | 20.4        | 5.6           | 15.3         | 73.5        | 76.2        | 47.2        | 10.5        | 54.3        | 12.1        | 5.3         | 10.6        | 27.3        |   |      |      |
|         | Ours            | ✗            | ✓          | 78.9        | <b>31.4</b> | <b>79.3</b> | 9.6         | 0.2        | <b>27.3</b> | 10.1          | 15.6         | 76.2        | 78.5        | 45.1        | 16.4        | 69.8        | 13.6        | 8.3         | 22.7        | <b>36.4</b> |   |      |      |
|         | NonAdapt Ours   | ✗            | ✗          | 14.7        | 11.8        | 68.5        | 7.3         | 0.1        | 19.6        | 4.6           | 14.4         | 71.8        | 73.2        | 48.5        | 9.1         | 56.1        | 11.7        | 4.9         | 11.7        | 26.8        |   |      |      |
|         | Ours            | ✗            | ✗          | 77.5        | 30.7        | 78.6        | 5.6         | 0.2        | 26.7        | 10.6          | 16.1         | 75.2        | 76.5        | 44.1        | 15.8        | 69.9        | 14.7        | 8.6         | 17.6        | 35.5        |   |      |      |
